# Supplementary material for: Reaction with Proteins of a Five-Coordinate Platinum(II) Compound
Source: MDPI journal article supplement (doi:10.3390/ijms20030520), 2019-01-26
Supplement: s1 [file s1]

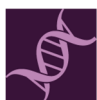

## Supplementary Information

### Reaction with Proteins of a Five-Coordinate Platinum(II) Compound

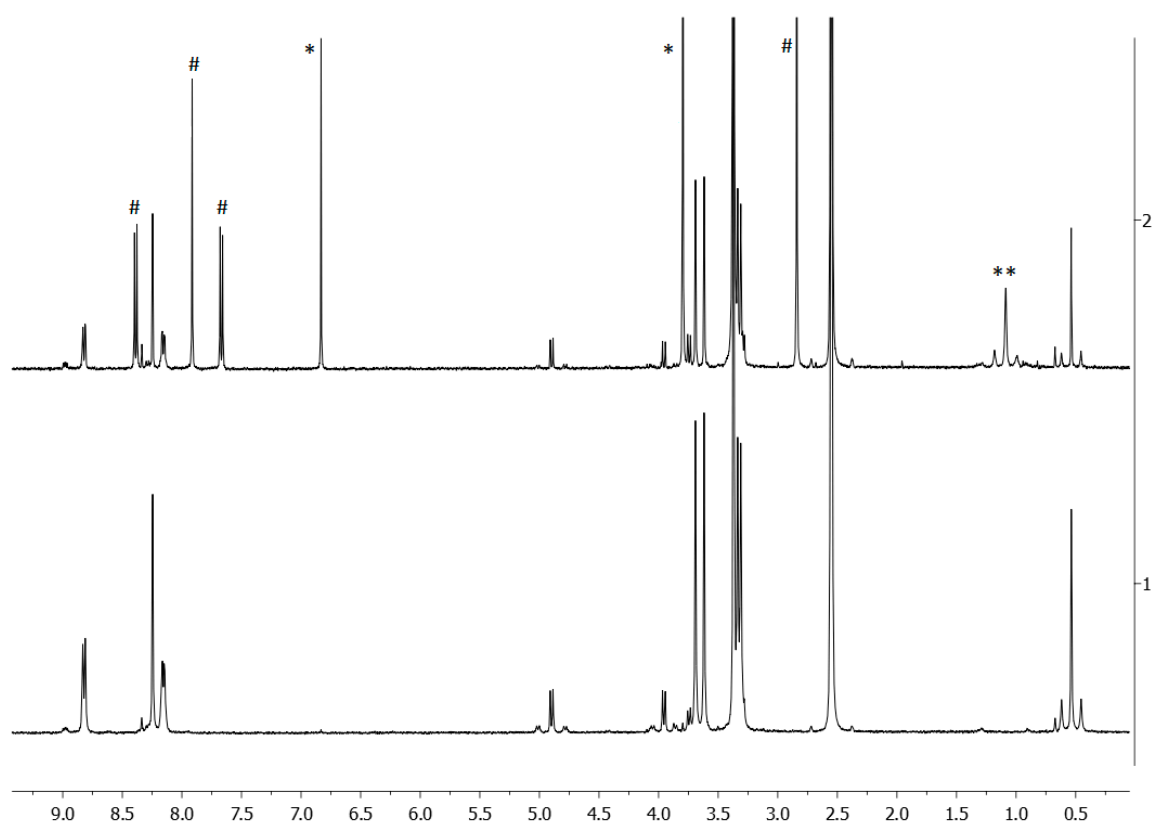

**Figure S1.**  $^1\text{H}$  NMR spectra at 400 MHz in  $\text{DMSO-d}_6$  of  $[\text{Pt}(\text{I})(\text{Me})(\text{dmphen})(\text{dimethylfumarate})]$  after 5 minutes (trace 1) and after 18 hours (trace 2). Legend: \*: free dimethylfumarate; #: free dmphen; \*\*: Pt-Me in the square-planar product.

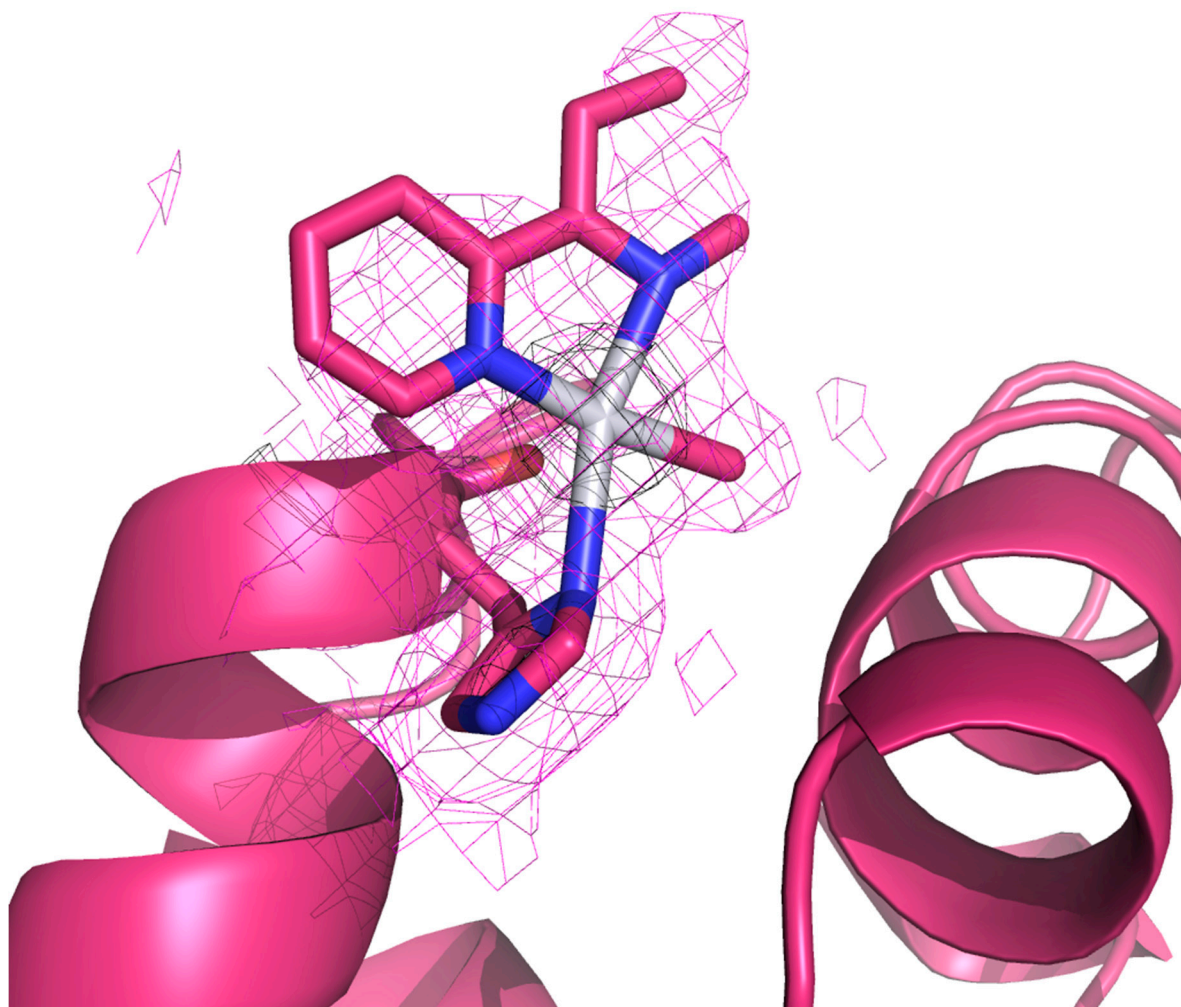

**Figure S2.** Details of the binding site of compound **I** fragment to HEWL. 2Fo-Fc electron density map is contoured at 3 $\sigma$  (dark grey), 0.3  $\sigma$  (purple) level. Pt is in grey.

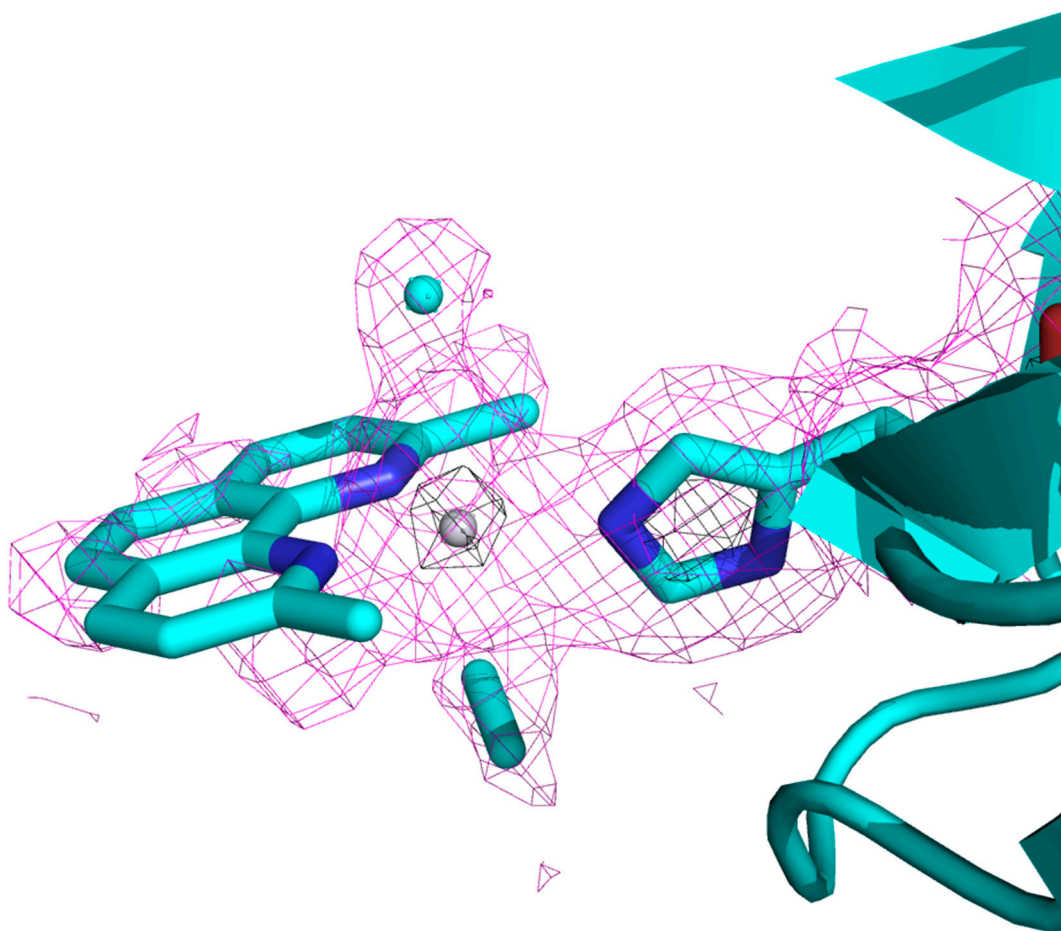

**Figure S3.** Details of the binding site of compound I fragment to molecule B of RNase A-compound I adduct. 2Fo-Fc electron density maps are contoured at  $3\sigma$  (dark grey) and  $0.3\sigma$  (purple) level. Pt is in grey.

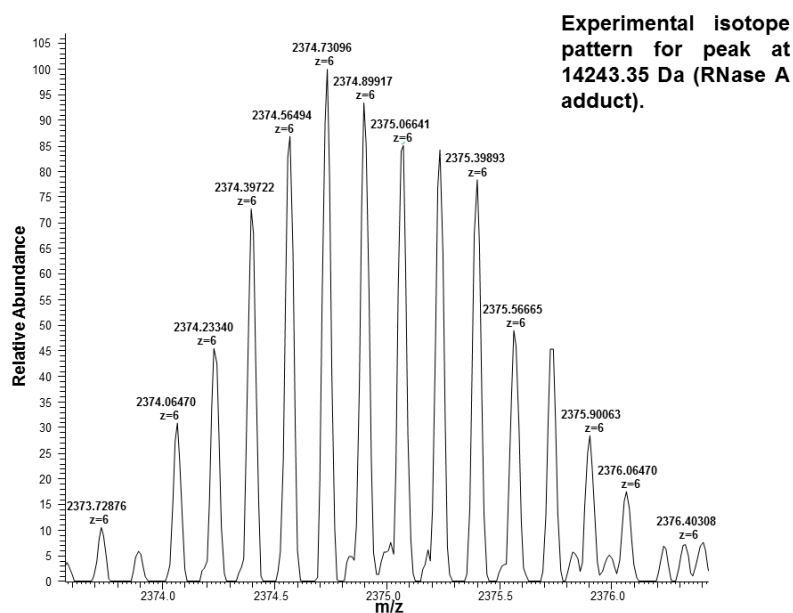

(a)

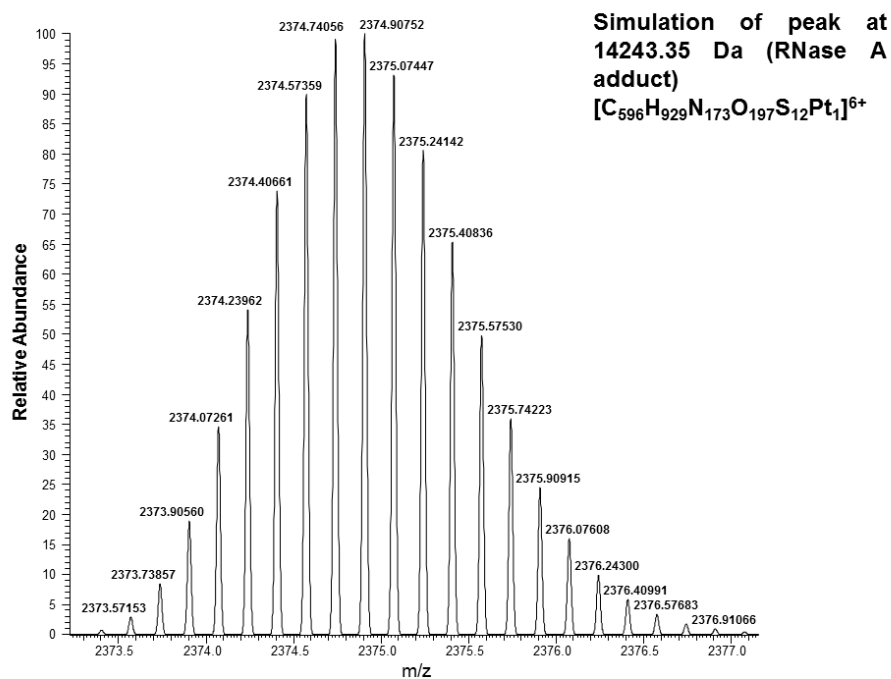

(b)

**Figure S4.** Experimental isotope (a) and theoretical simulation (b) pattern for the peak at 14243.35 Da obtained when RNase A was incubated with complex I (RNase A adduct)

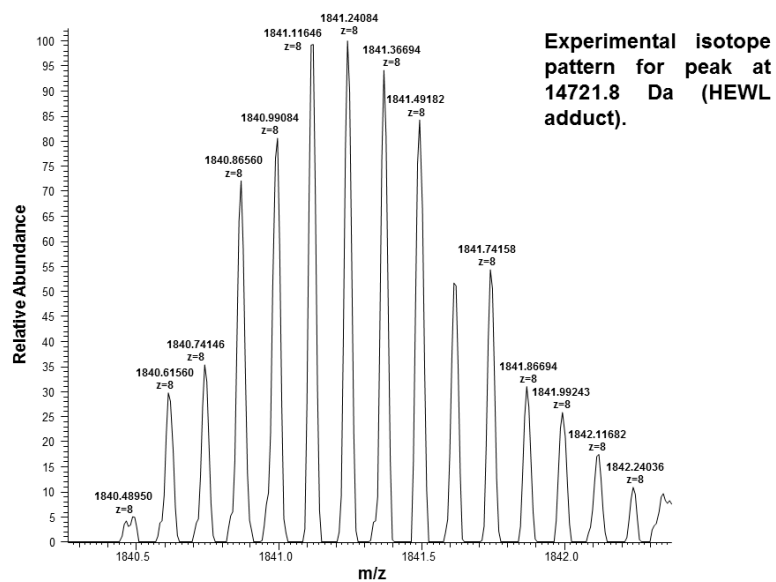

(a)

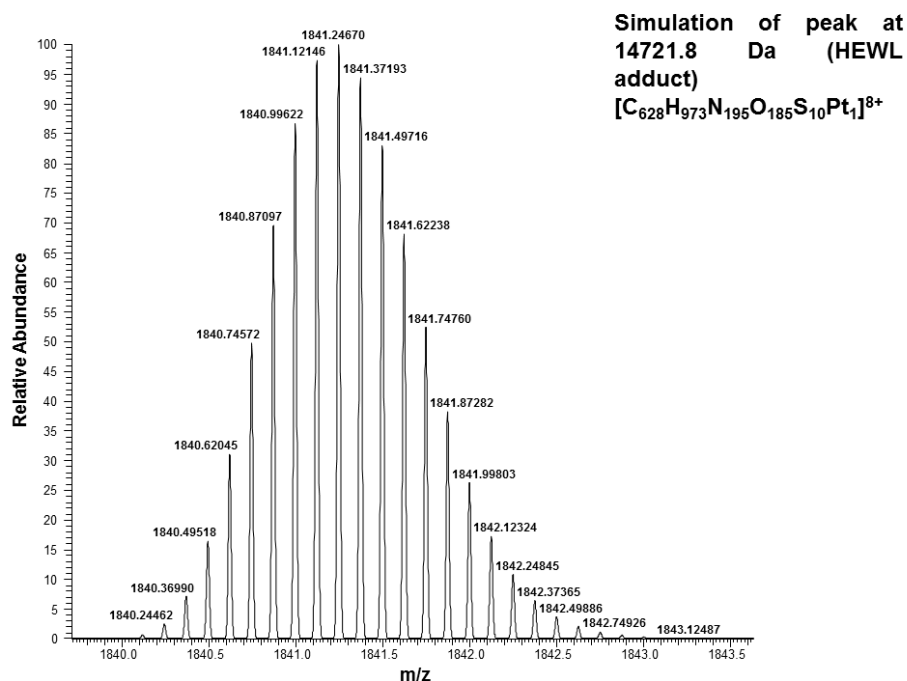

(b)

**Figure S5.** Experimental isotope (a) and theoretical simulation (b) pattern for the peak at 14721.8 Da obtained when HEWL was incubated with complex I ( HEWL adduct)

**Table S1.** Data collection and refinement statistics

|                                      | HEWL-Compound I<br>6QEA          | RNase A-Compound I<br>6QE9 |
|--------------------------------------|----------------------------------|----------------------------|
| PDB code                             |                                  |                            |
| Data-collection                      |                                  |                            |
| Space group                          | P4 <sub>3</sub> 2 <sub>1</sub> 2 | C2                         |
| Unit cell parameters                 |                                  |                            |
| a,b,c (Å); β                         | 78.36, 78.36, 37.35; 90.0        | 99.00, 30.66, 68.68; 93.0  |
| Molecules per asymmetric unit        | 1                                | 2                          |
| Observed reflections                 | 58658                            | 36001                      |
| Unique reflections                   | 8815                             | 12949                      |
| Resolution (Å)                       | 55.41-1.96 (1.99-1.96)           | 50.00-2.03 (2.07-2.03)     |
| Rmerge†                              | 0.099 (0.597)                    | 0.085 (0.528)              |
| Completeness (%)                     | 99.9 (100.0)                     | 94.8 (92.3)                |
| I/σ(I)                               | 13.3 (2.9)                       | 8.9 (2.3)                  |
| Multiplicity                         | 6.7 (5.0)                        | 2.8 (2.8)                  |
| Refinement                           |                                  |                            |
| Resolution (Å)                       | 55.41-1.96                       | 22.89-2.03                 |
| number of reflections in working set | 8367                             | 12313                      |
| number of reflections in test set    | 417                              | 636                        |
| R factor/Rfree (%)                   | 0.168 (0.204)                    | 0.176 (0.254)              |
| Number of non-hydrogen atoms         | 1178                             | 2088                       |
| Occupancy of Pt ion                  | 0.50                             | 0.60, 0.40                 |
| B-factor of Pt ion (Å <sup>2</sup> ) | 49.9                             | 40.0, 74.7                 |
| Overall B-factor (Å <sup>2</sup> )   | 23.0                             | 30.8                       |
| Ramachandran values (%)              |                                  |                            |
| Most favoured/ Additional allowed    | 96.5/ 3.5                        | 94.9/3.0                   |
| Generously allowed/ Disallowed       | 0.0                              | 2.1*                       |
| R.m.s.d. bonds (Å)                   | 0.009                            | 0.008                      |
| R.m.s.d. angles (Å)                  | 1.62                             | 1.52                       |

\*Outliers are Gln60B, residues of the molecule A hinge peptide (residues 18, 19 and 23), which is disordered in many structures of RNase A including RNase A-compound I, and Ser90B.
